# Supplementary material for: Activation of intervertebral disc cells by co-culture with notochordal cells, conditioned medium and hypoxia
Source: PubMed Central journal article supplement (PMC4295479; doi:10.1186/1471-2474-15-422), 2014-12-11
Supplement: 12891_2014_2382_MOESM6_ESM.pdf [file 12891_2014_2382_MOESM6_ESM.pdf]

## porcine NC

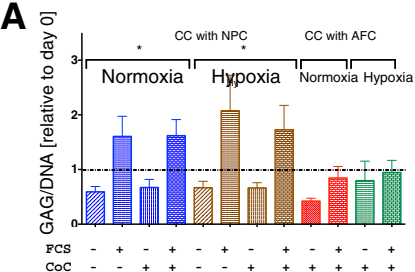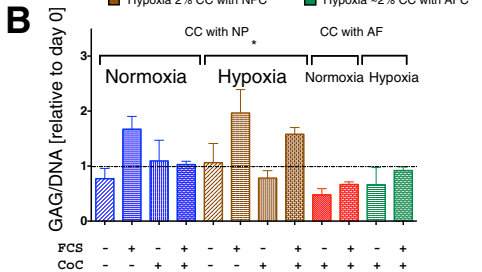

## bovine NPC

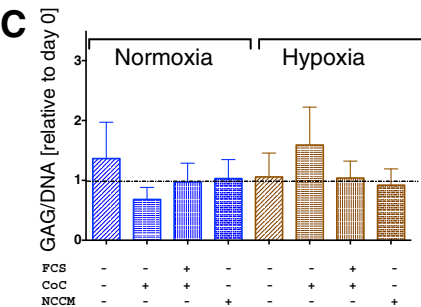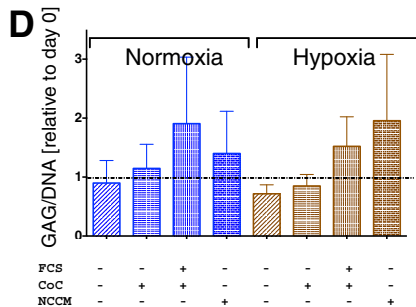

## bovine AFC

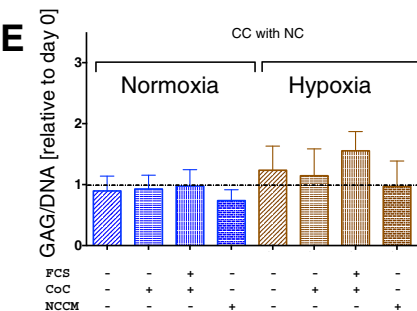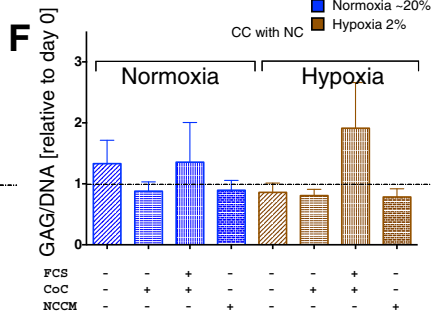

day 7

day 14
