# Supplementary material for: Activation of intervertebral disc cells by co-culture with notochordal cells, conditioned medium and hypoxia
Source: PubMed Central journal article supplement (PMC4295479; doi:10.1186/1471-2474-15-422), 2014-12-11

# gene expression porcine NC

**A**
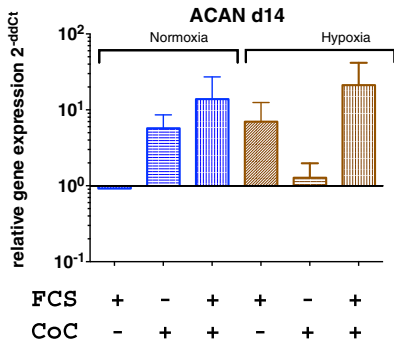
**B**
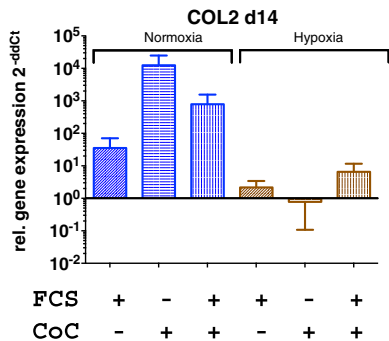
**C**
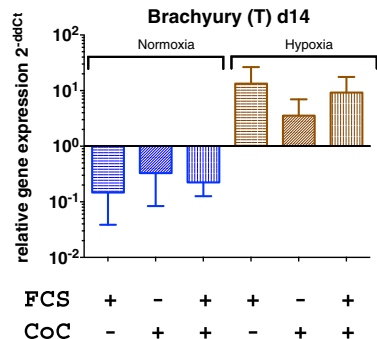
**D**
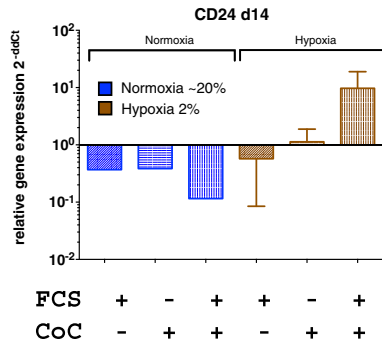

Supplement: 12891_2014_2382_MOESM7_ESM.pdf [file 12891_2014_2382_MOESM7_ESM.pdf]
